# Supplementary material
Source: PubMed Central journal article supplement (PMC3459273)
Supplement: neo1409_0778SD1.pdf [file neo1409_0778SD1.pdf]

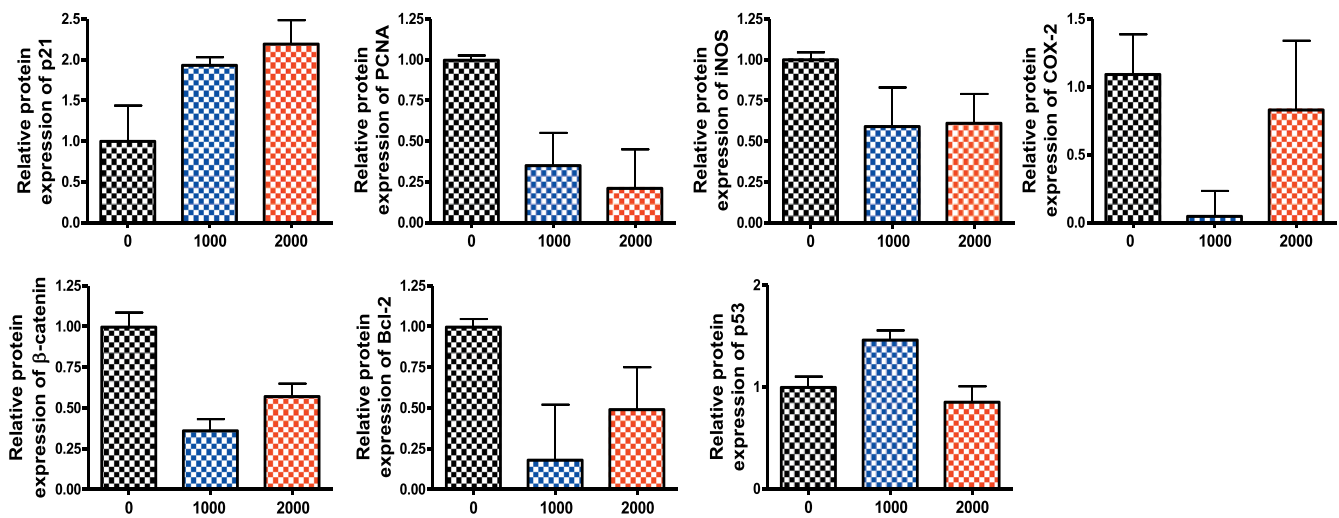

**Figure W1.** Effect of NO-aspirin on protein expression levels of p21, PCNA, iNOS, COX-2,  $\beta$ -catenin, Bcl-2, and p53 expression in pancreatic ductal adenocarcinoma. Protein expression was analyzed by Western blot analysis as described in the text and quantified by densitometry.
